# Supplementary material for: Structural basis for recognition of the malaria vaccine candidate Pfs48/45 by a transmission blocking antibody
Source: PubMed Central journal article supplement (PMC6148045; doi:10.1038/s41467-018-06340-9), 2018-09-20
Supplement: 41467_2018_6340_MOESM1_ESM.pdf [file 41467_2018_6340_MOESM1_ESM.pdf]

## **Supplementary Information**

### **Structural basis for recognition of the malaria vaccine candidate Pfs48/45 by a transmission blocking antibody**

Lennartz, Brod *et al*

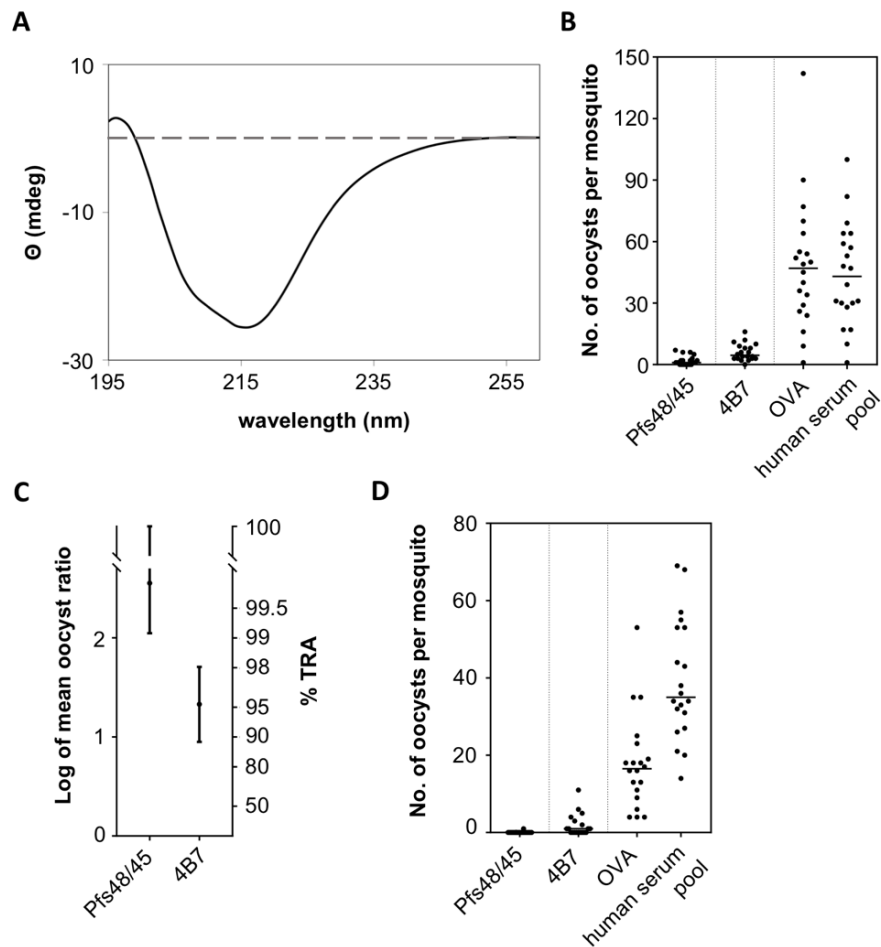

**Supplementary Figure 1: SMFA and CD spectroscopy to validate the functionality and fold of full length Pfs48/45**

**A.** Secondary structure analysis of Pfs48/45-FL. CD spectra were recorded at 20°C. Four measurements were averaged and corrected for buffer absorption. **B** Oocyst numbers of SMFA experiments reported in Figure 1. SMFA of purified IgG (750  $\mu\text{g}/\text{ml}$ ) from mice immunised with Pfs48/45 or OVA were mixed with *P. falciparum* NF54 cultured gametocytes and fed to *A. stephensi* mosquitoes (n = 20 per test group) in SMFA. Midguts were dissected 8 days post-feeding. Data points represent the number of oocysts in individual mosquitoes and the lines show the arithmetic mean. Transmission blocking mAb 4B7 was used as a positive control at a concentration of 94  $\mu\text{g}/\text{ml}$ . **C** Results in Figure 1D were confirmed in an independent experiment (n=10). Transmission reducing activity of purified IgG from mice was determined relative to purified IgG from mice immunised with OVA at 750  $\mu\text{g}/\text{ml}$ . Transmission blocking mAb 4B7 was used as a positive control at a concentration of 94  $\mu\text{g}/\text{ml}$ . Data points show transmission reducing activity (TRA) calculated from the oocyst counts in 20 mosquito midguts. Error bars show 95% CI. SMFA was performed in the absence of human complement. **D** Oocyst numbers of SMFA experiments shown in **C**. Data points represent the number of oocysts in individual mosquitoes (n=20) and the lines show the arithmetic mean.

**A**

| Blocker | Biotinylated mAb |      |      |      |      |      |      |      |         |      |      |      |         |       |          |      |  |
|---------|------------------|------|------|------|------|------|------|------|---------|------|------|------|---------|-------|----------|------|--|
|         | Group A          |      |      |      |      |      |      |      | Group B |      |      |      | Group C |       | no group |      |  |
|         | 6A10             | 1F10 | 3G3  | 10D8 | 2F5  | 5E4  | 4C11 | 6E8  | 1B12    | 6E1  | 3H6  | 7A7  | 9D1     | 10F10 | 9A6      | 7A6  |  |
| 6A10    | 0.40             | 0.27 | 0.19 | 0.25 | 0.48 | 0.44 | 0.16 | 0.43 | 2.84    | 1.90 | 0.15 | 0.12 | 2.43    | 0.88  | 0.35     | 1.56 |  |
| 1F10    | 0.42             | 0.17 | 0.23 | 0.18 | 0.51 | 0.41 | 0.18 | 0.48 | 2.46    | 2.05 | 0.13 | 0.10 | 0.27    | 0.82  | 0.32     | 1.70 |  |
| 3G3     | 0.59             | 0.31 | 0.29 | 0.39 | 0.81 | 0.65 | 0.19 | 0.61 | 2.05    | 1.92 | 0.14 | 0.09 | 1.37    | 0.76  | 0.40     | 1.41 |  |
| 10D8    | 0.60             | 0.29 | 0.27 | 0.11 | 0.67 | 0.49 | 0.23 | 0.67 | 1.94    | 1.81 | 0.16 | 0.13 | 2.16    | 0.86  | 0.42     | 0.43 |  |
| 2F5     | 0.38             | 0.23 | 0.21 | 0.25 | 0.51 | 0.41 | 0.15 | 0.41 | 2.03    | 1.81 | 0.15 | 0.11 | 1.40    | 0.76  | 0.27     | 1.27 |  |
| 5E4     | 0.39             | 0.23 | 0.19 | 0.20 | 0.48 | 0.38 | 0.16 | 0.43 | 2.49    | 1.81 | 0.15 | 0.13 | 2.11    | 0.66  | 0.35     | 1.31 |  |
| 4C11    | 1.01             | 0.71 | 0.57 | 0.80 | 1.49 | 1.05 | 0.32 | 1.01 | 2.35    | 1.90 | 0.14 | 0.10 | 0.82    | 0.82  | 0.60     | 1.42 |  |
| 6E8     | 0.40             | 0.24 | 0.22 | 0.25 | 0.44 | 0.37 | 0.17 | 0.47 | 1.74    | 1.75 | 0.15 | 0.13 | 1.95    | 0.75  | 0.32     | 1.29 |  |
| 1B12    | 1.64             | 2.04 | 1.73 | 1.20 | 2.87 | 1.64 | 0.78 | 1.67 | 1.31    | 1.21 | 0.17 | 0.13 | 1.67    | 0.84  | 1.11     | 1.65 |  |
| 6E1     | 1.41             | 1.34 | 1.22 | 1.15 | 1.97 | 1.12 | 0.68 | 1.47 | 1.60    | 1.14 | 0.15 | 0.11 | 1.31    | 0.71  | 1.15     | 1.54 |  |
| 3H6     | 1.69             | 1.38 | 1.49 | 1.28 | 2.73 | 1.66 | 0.64 | 1.53 | 2.17    | 2.00 | 0.09 | 0.08 | 1.58    | 0.98  | 0.68     | 1.17 |  |
| 7A7     | 1.67             | 1.37 | 1.43 | 1.16 | 2.18 | 1.45 | 0.67 | 1.61 | 1.87    | 1.86 | 0.09 | 0.08 | 1.68    | 0.88  | 0.63     | 1.14 |  |
| 9D1     | 1.86             | 0.78 | 1.42 | 1.73 | 2.47 | 1.55 | 0.64 | 1.76 | 1.77    | 1.91 | 0.12 | 0.10 | 0.18    | 0.87  | 0.66     | 0.90 |  |
| 10F10   | 1.67             | 1.80 | 1.27 | 1.16 | 2.07 | 1.29 | 0.67 | 1.65 | 2.40    | 1.97 | 0.17 | 0.13 | 2.19    | 0.36  | 1.01     | 1.52 |  |
| 9A6     | 1.65             | 1.33 | 1.23 | 1.00 | 2.16 | 1.40 | 0.59 | 1.56 | 1.91    | 1.93 | 0.12 | 0.10 | 1.80    | 1.33  | 0.31     | 0.95 |  |
| 7A6     | 1.65             | 1.52 | 1.41 | 0.61 | 1.95 | 1.32 | 0.65 | 1.67 | 1.95    | 1.85 | 0.10 | 0.09 | 1.44    | 0.84  | 0.24     | 0.32 |  |

**B**

| Blocker | Biotinylated mAb |      |
|---------|------------------|------|
|         | 32F3             | 45.1 |
| 1B12    | 2.62             | 2.59 |
| 1F10    | 2.62             | 2.67 |
| 2F5     | 2.32             | 1.99 |
| 3G3     | 2.85             | 2.28 |
| 3H6     | 2.80             | 2.33 |
| 4C11    | 2.16             | 2.01 |
| 5E4     | 2.04             | 1.97 |
| 6A10    | 2.32             | 2.06 |
| 6E1     | 2.91             | 2.93 |
| 6E8     | 2.54             | 2.69 |
| 7A6     | 2.44             | 2.22 |
| 7A7     | 2.29             | 2.18 |
| 9A6     | 2.08             | 2.01 |
| 9D1     | 2.17             | 2.06 |
| 10D8    | 1.86             | 1.86 |
| 10F10   | 1.93             | 1.75 |
| self    | 1.18             | 1.21 |

**C**

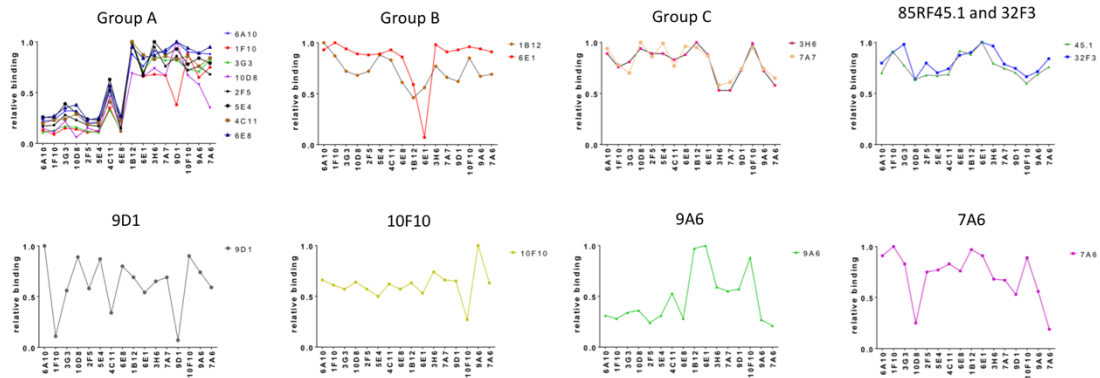

**Supplementary Figure 2: Cross-competition ELISA.**

**A** OD<sub>405</sub> for all combinations of blocking and biotinylated mAbs (average of two technical replicates). **B** OD<sub>405</sub> of cross competition ELISA of 32F3 and 85RF45.1 against all mAbs in the Pfs48/45 mAb panel (average of two technical replicates). **C** OD<sub>405</sub> values for all combinations of blocking and biotinylated mAbs were normalised to a value between 1 and 0 to allow plotting on a shared y-axis. Relative binding of each biotinylated mAb calculated this way was plotted against each blocking mAb to visualise competition groups.

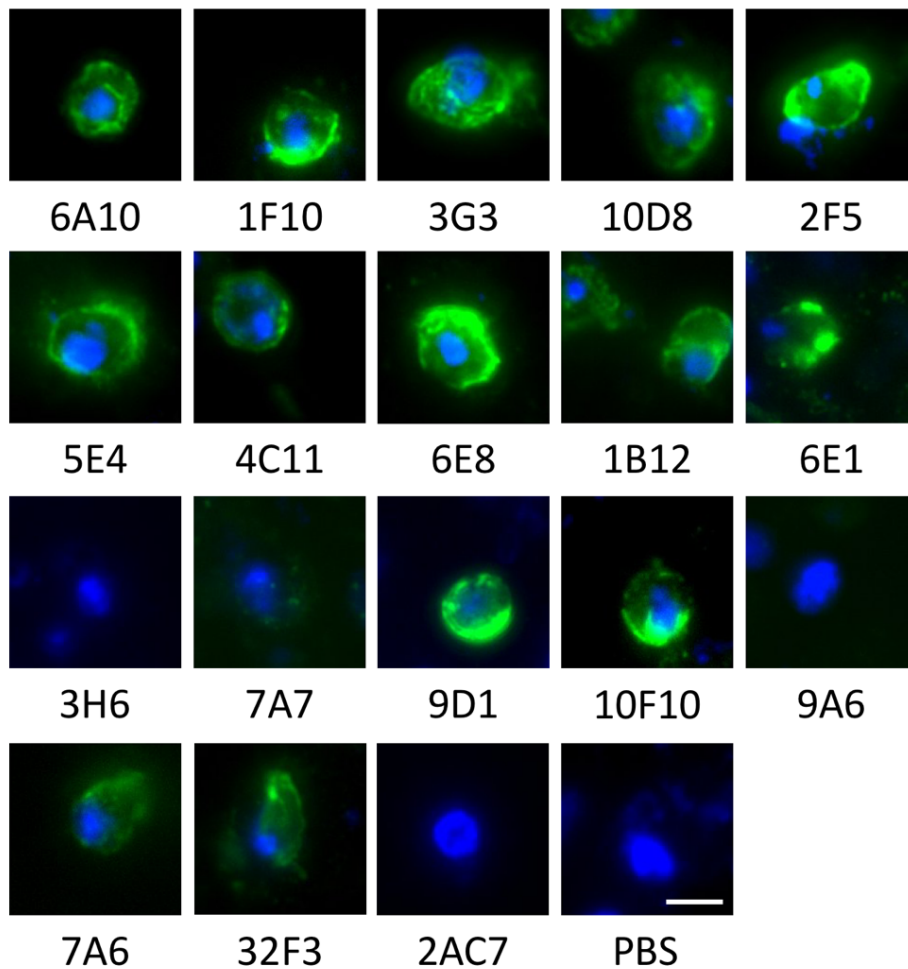

**Supplementary Figure 3: Assessing the binding of Pfs48/45 mAbs to gametes**

Pfs48/45 mAbs were assessed for their ability to bind to *in vitro* generated *P. falciparum* NF54 gametes. 2AC7 is a negative control that targets PfrH5. A representative image from two technical replicates is shown for each mAb. Images taken at 100x magnification. Scalebar = 2  $\mu$ m.

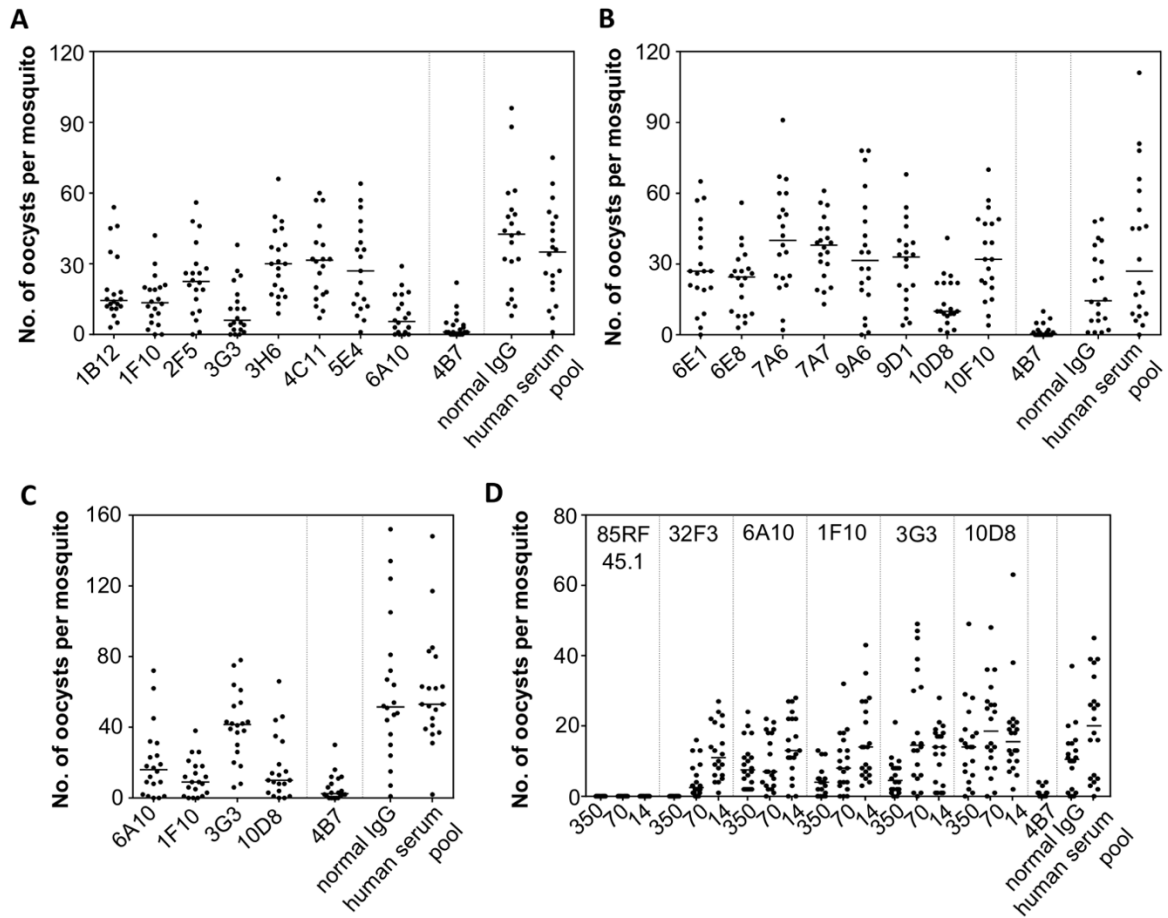

**Supplementary Figure 4: Oocyst numbers for SMFA experiments testing newly generated anti Pfs48/45 mAbs and their comparison with previously characterized mAbs.**

Monoclonal antibodies were mixed with *P. falciparum* NF54 cultured gametocytes and fed to *A. stephensi* mosquitoes (n = 20 per test group) in SMFA. Midguts were dissected 8 days post-feeding. Data points represent the number of oocysts in individual mosquitoes and the lines show the arithmetic mean. **A and B** SMFA of the anti-Pfs48/45 mAb panel at a concentration of 375  $\mu\text{g}/\text{ml}$ . Normal mouse antibody at a concentration of 750  $\mu\text{g}/\text{ml}$  was used as a negative control. Transmission blocking mAb 4B7 at a concentration of 94  $\mu\text{g}/\text{ml}$  was used as a positive control. **C** Repeat SMFA of the anti-Pfs48/45 mAbs that had shown TRA in the previous SMFA at a concentration of 375  $\mu\text{g}/\text{ml}$ . Normal mouse antibody at a concentration of 750  $\mu\text{g}/\text{ml}$  was used as a negative control. Transmission blocking mAb 4B7 at a concentration of 94  $\mu\text{g}/\text{ml}$  was used as a positive control. **D**. SMFA was performed with the mAbs 85RF45.1, 32F3, 1F10, 3G3, 6A10 and 10D8 at concentrations of 350  $\mu\text{g}/\text{ml}$ , 70  $\mu\text{g}/\text{ml}$  and 14  $\mu\text{g}/\text{ml}$ . Transmission blocking mAb 4B7 was used as a positive control at a concentration of 94  $\mu\text{g}/\text{ml}$ . Normal mouse antibody at a concentration of 750  $\mu\text{g}/\text{ml}$  was used as a negative control.

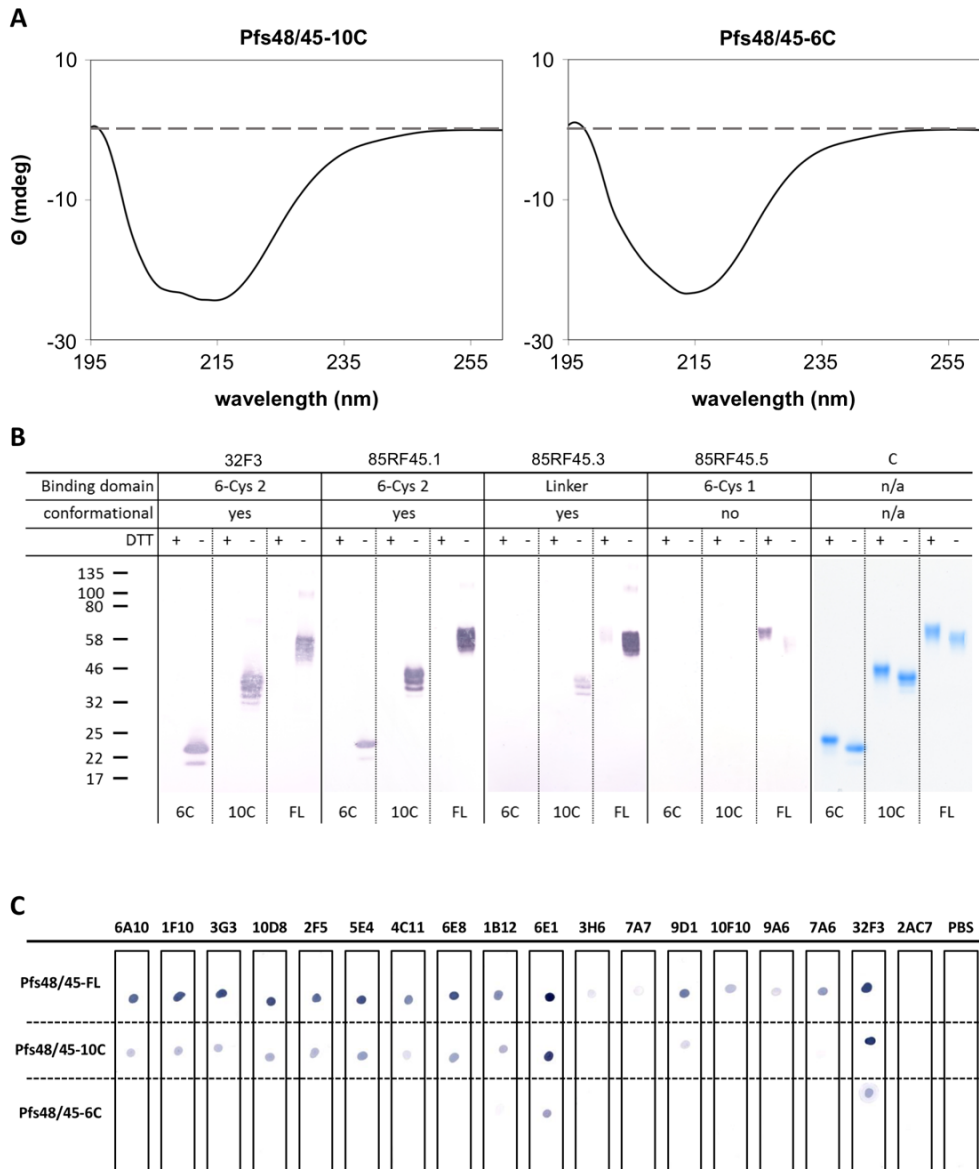

**Supplementary Figure 5: CD spectroscopy of Pfs48/45-10C and 6C and their reactivity towards all characterized mAbs**

**A** Secondary structure analysis of Pfs48/45 variants. CD spectra for Pfs48/45-10C and Pfs48/45-6C were recorded at 20°C. Four measurements were averaged and corrected for buffer absorption. **B** Western Blots and Coomassie gel of Pfs48/45-FL, -10C and -6C. Proteins were run on 4-12% Bis-Tris Polyacrylamide gels in the presence and absence of DTT as a reducing agent and then either stained with Coomassie brilliant blue (C) or blotted on nitrocellulose membranes and detected with Pfs48/45 specific monoclonal antibodies (32F3, 85RF45.1, 85RF45.3 and 85RF45.5, at a concentration of 1 µg/ml). **C** Pfs48/45 FL, 10C and 6C were spotted on nitrocellulose membrane strips. Strips were then blocked in 2% BSA in PBS-T and the probed with the panel of anti-Pfs48/45 monoclonal antibodies (at a concentration of 1 µg/ml). 32F3 was used as a positive control. The Rh5 mAb 2AC7 and PBS were used as negative controls.

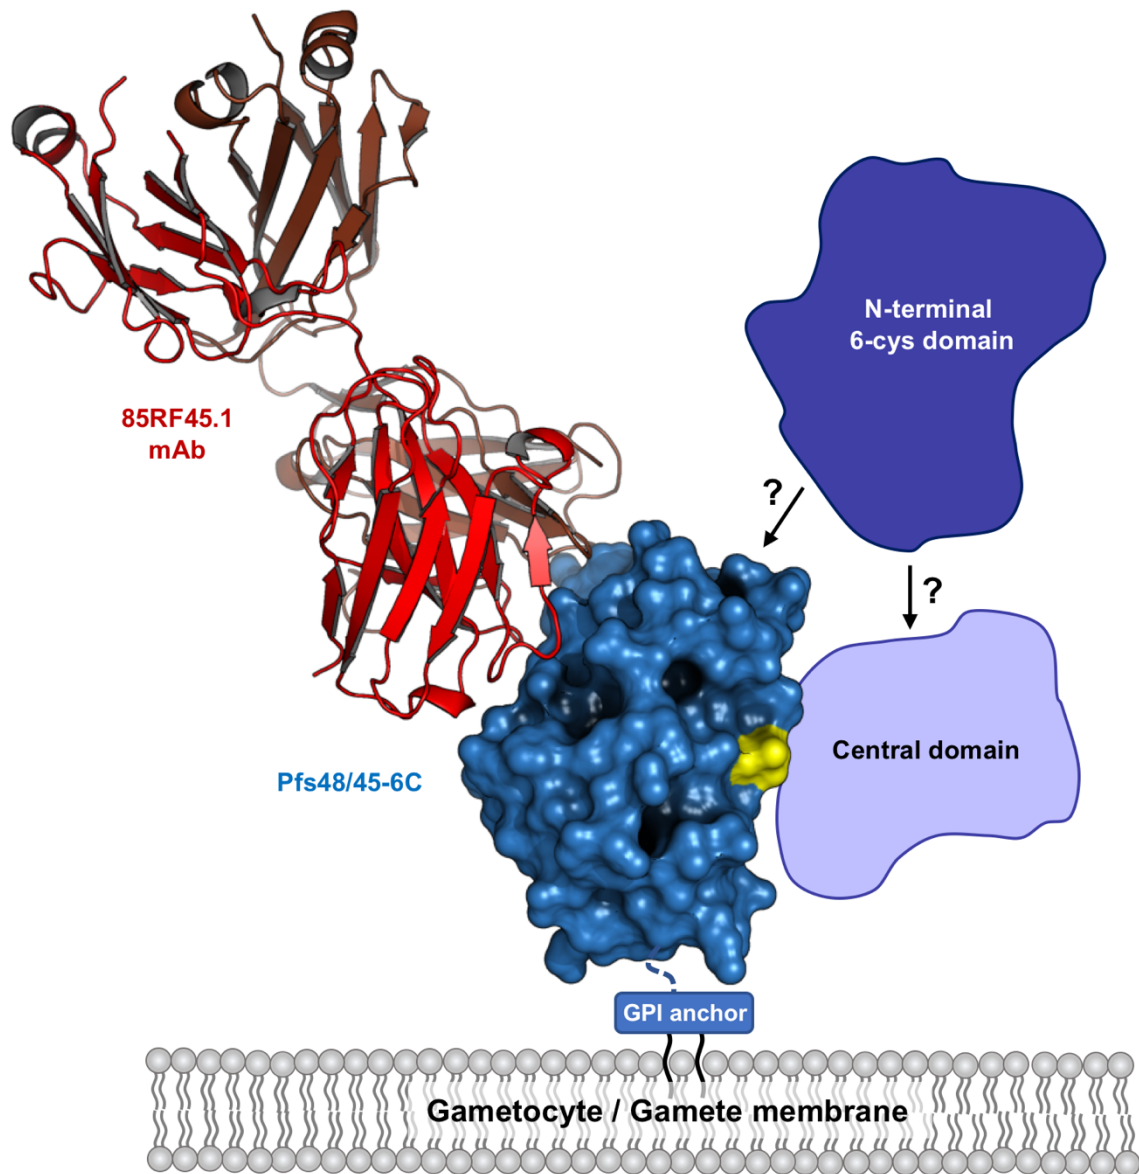

**Supplementary Figure 6: Model of how Pfs48/45-6C might be positioned on the gametocyte membrane**

The crystal structure of Pfs48/45 is oriented towards the membrane as expected by its C-terminal link to a Glycosylphosphatidylinositol (GPI) anchor (indicated by the dashed line). The locations of the N-terminal and central domains are currently unknown. However, the central domain must emerge from N-terminus (highlighted in yellow) of the C-terminal domain of Pfs48/45 and the N-terminal and central domains must project away from the epitope for 85RF45.1 (red) in full-length Pfs48/45 (see Figures 2 and 3).

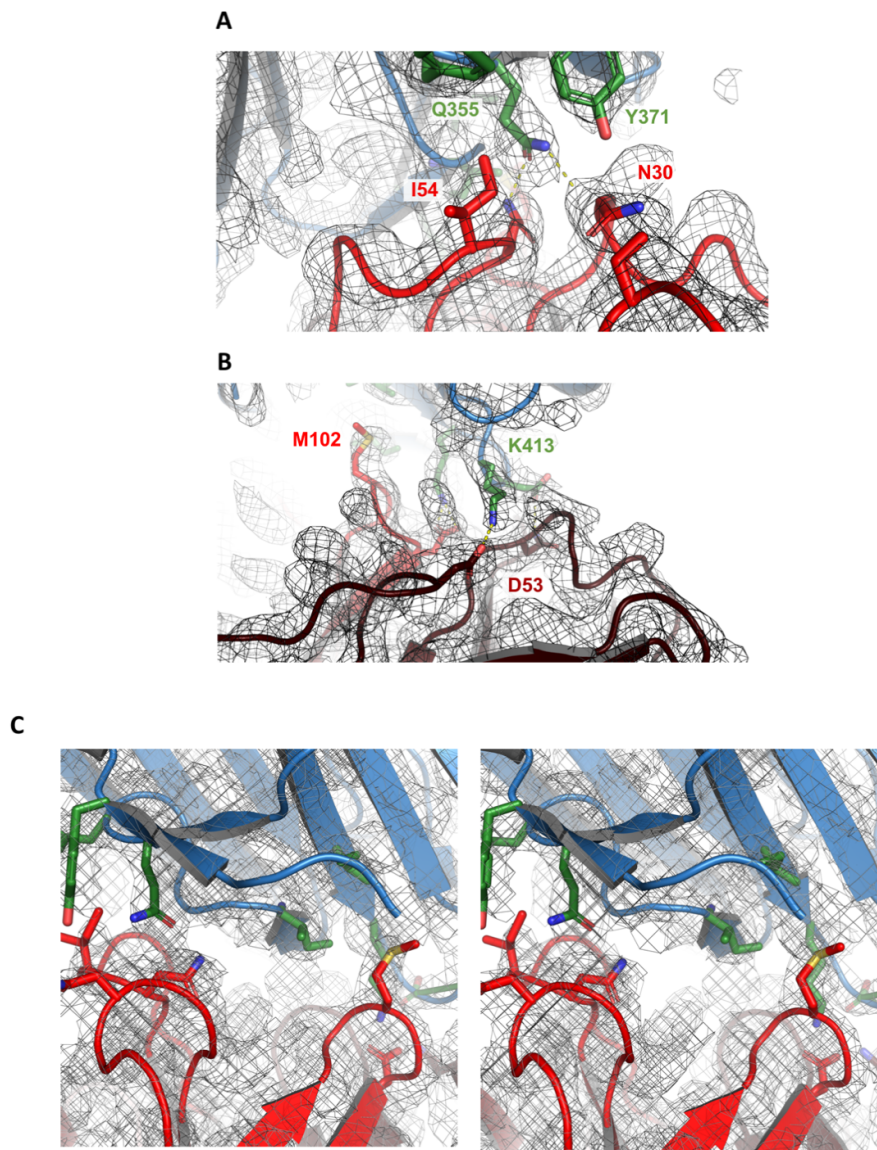

**Supplementary Figure 7: Electron density at the Pfs48/45-6C-85RF45.1 Fab interface**  
**A and B** show two different views of the 85RF45.1 Fab – Pfs48/45 Fab interface. **C** shows a stereo view of the electron density at the 85RF45.1 Fab – Pfs48/45 Fab interface. Residues from 85RF45.1 Fab (red/dark red) that interact with Pfs48/45-6C (green) are shown in stick representation and numbered and colored as in Figure 5. The electron density is the refined 2Fo-Fc electron density shown at  $1\sigma$ . Hydrogen bonds are indicated by dashed lines



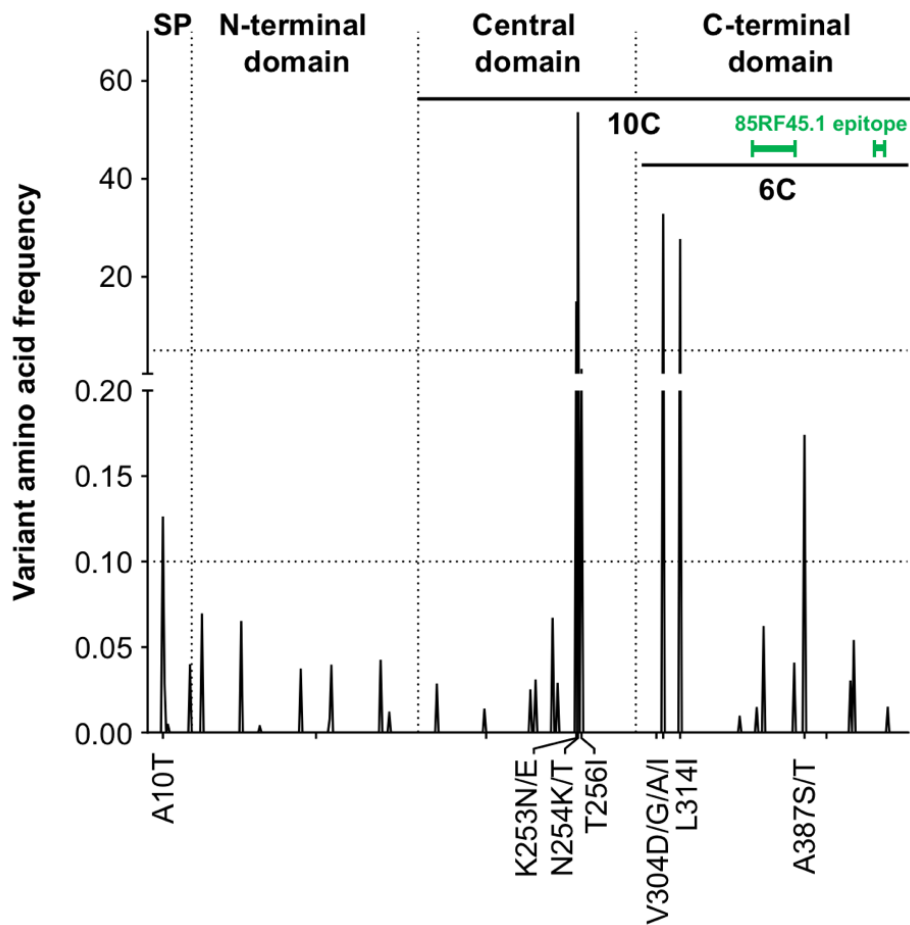

**Supplementary Figure 8: Amino acids polymorphisms among Pfs48/45 sequences in the Pf3k database.**

Variant amino acid frequency was calculated as the alternative allele depth divided by the total allele depth for all single-nucleotide polymorphisms (SNPs) coding an amino acid change within Pfs48/45 in Pf3k release 3 (>2,400 sequences). Where multiple SNPs caused a change in the same amino acid, their frequencies were added together. Variant amino acid frequency was then plotted against the amino acid position within Pfs48/45 and amino acid changes with a frequency of above 0.1% were annotated. Green bars indicate the location of the 85RF45.1 epitope.

**Supplementary Table 1. List of contacts between 85RF45.1 Fab and Pfs48/45-6C**

Colors correspond to the 85RF45.1 heavy and light chain as coloured in Figures 4 and 5 of the main text

---

| <b>85RF45.1 Fab</b> |                           | <b>Pfs48/45-6C</b> |                           | <b>Type of Interaction</b> |
|---------------------|---------------------------|--------------------|---------------------------|----------------------------|
| <b>Residue</b>      | <b>Group</b>              | <b>Residue</b>     | <b>Group</b>              |                            |
| <b>Asn30</b>        | Sidechain NH <sub>2</sub> | Tyr371             | Sidechain OH              | Hydrogen bond              |
| <b>Asn53</b>        | Sidechain NH <sub>2</sub> | Gln355             | Sidechain O               | Hydrogen bond              |
| <b>Ile54</b>        | Sidechain                 | Tyr371             | Sidechain                 | Hydrophobic                |
| <b>Ile54</b>        | Sidechain                 | Phe354             | Sidechain                 | Hydrophobic                |
| <b>Met102</b>       | Sidechain                 | Ile349             | Sidechain                 | Hydrophobic                |
| <b>Met102</b>       | Sidechain                 | Ile411             | Sidechain                 | Hydrophobic                |
| <b>Met102</b>       | Sidechain                 | Lys413             | Sidechain                 | Hydrophobic                |
| <b>Asp104</b>       | Sidechain                 | Lys413             | Sidechain NH <sub>3</sub> | Hydrogen bond              |
| <b>Asn32</b>        | Sidechain NH <sub>2</sub> | Asp415             | Sidechain O               | Hydrogen bond              |
| <b>Asp52</b>        | Sidechain O               | Lys416             | Sidechain NH <sub>3</sub> | Hydrogen bond              |
